# Supplementary material
Source: MDPI journal article supplement (https://www.mdpi.com/2073-4441/13/9/1289)
Supplement: s1 [file s1]

# The relative effects of biotic and abiotic factors on the recruitment of freshwater mussels (*Margaritifera laevis*)

Keita Kawajiri, Nobuo Ishiyama, Kazuki Miura, Akira Terui, Masanao Sueyoshi and Futoshi Nakamura

Supplementary Materials:

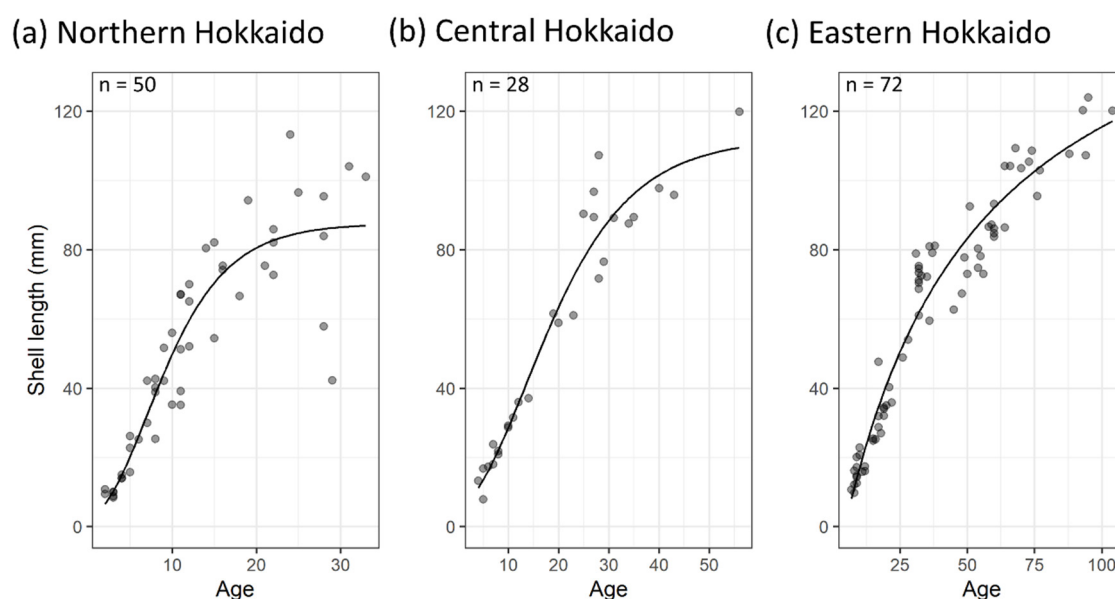

**Figure S1.** Relationships between shell length and age in the three regions. The plots represent the observed values. The solid lines represent the values predicted by the linear models that used the Gompertz function (a, b) and hyperbolic function (c) based on the results of the estimations of four nonlinear growth models (Table S2).

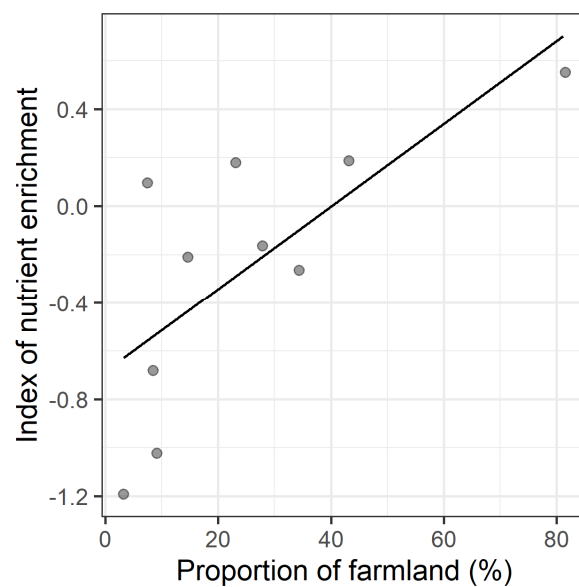

**Figure S2.** Relationship between the index of nutrient enrichment and proportion of farmland. The plots represent the observed values. The solid line represents the values predicted by the model.  $R^2$ : 0.521.

Analysis method: We used a general linear model (GLMs;  $n=10$ ) with Gaussian error to examine how land-use modifications affected the index of nutrient enrichment. We treated the index of nutrient enrichment as a response variable and the proportion of farmland as an explanatory variable.

**Table S1.** Abiotic and biotic factors used in the statistical analysis. The values represent the average [standard deviation] at each site.

| Stream | Mussel<br>abundance<br>(ind. 1.35 m <sup>-2</sup> ) | Surface<br>water width<br>(m) | Water depth<br>(cm) | Proportion<br>of fine<br>sediment<br>(%) | Summer<br>maximum<br>water temperature<br>(°C) | Index of<br>nutrient<br>enrichment | Host fish<br>density<br>(ind. m <sup>-2</sup> ) | Proportion<br>of farmland<br>(%) |
|--------|-----------------------------------------------------|-------------------------------|---------------------|------------------------------------------|------------------------------------------------|------------------------------------|-------------------------------------------------|----------------------------------|
| A      | 149.63<br>[123.61]                                  | 4.50<br>[1.27]                | 32.25<br>[14.78]    | 34.44<br>[8.83]                          | 25.13                                          | -0.31                              | 0.36                                            | 31.15                            |
| B      | 87.90<br>[82.83]                                    | 6.58<br>[1.01]                | 26.13<br>[18.60]    | 27.31<br>[20.49]                         | 19.85                                          | 0.54                               | 0.19                                            | 44.41                            |
| C      | 75.31<br>[37.63]                                    | 5.91<br>[1.45]                | 32.57<br>[10.78]    | 28.01<br>[9.44]                          | 21.86                                          | -0.38                              | 0.17                                            | 11.34                            |
| D      | 35.31<br>[7.57]                                     | 8.82<br>[1.04]                | 39.57<br>[11.42]    | 9.09<br>[4.58]                           | 23.58                                          | 0.25                               | 0.13                                            | 14.28                            |
| E      | 59.01<br>[24.41]                                    | 9.67<br>[3.15]                | 34.20<br>[6.15]     | 13.88<br>[8.93]                          | 22.91                                          | 0.51                               | 0.06                                            | 23.16                            |
| F      | 20.25<br>[9.55]                                     | 5.88<br>[0.14]                | 21.60<br>[3.53]     | 9.53<br>[3.51]                           | 16.84                                          | -0.94                              | 0.30                                            | 3.11                             |
| G      | 12.35<br>[14.45]                                    | 9.77<br>[2.17]                | 26.23<br>[4.85]     | 15.94<br>[4.80]                          | 25.42                                          | -0.79                              | 0.15                                            | 9.03                             |
| H      | 15.56<br>[17.81]                                    | 3.03<br>[0.69]                | 18.55<br>[4.03]     | 19.13<br>[4.81]                          | 21.38                                          | -0.46                              | 0.56                                            | 50.69                            |
| I      | 94.44<br>[103.19]                                   | 8.73<br>[2.19]                | 29.90<br>[3.54]     | 14.93<br>[5.87]                          | 19.85                                          | -0.91                              | 0.53                                            | 9.14                             |
| J      | 96.30<br>[4.19]                                     | 8.59<br>[0.65]                | 36.60<br>[1.84]     | 20.09<br>[1.64]                          | 18.05                                          | 2.57                               | 0.02                                            | 80.93                            |

**Table S2.** Host fish density in the study streams (A-J) from 2005 to 2016.

| <b>Year</b> | <b>A</b> | <b>B</b> | <b>C</b> | <b>D</b> | <b>E</b> | <b>F</b> | <b>G</b> | <b>H</b> | <b>I</b> | <b>J</b> |
|-------------|----------|----------|----------|----------|----------|----------|----------|----------|----------|----------|
| 2005        | NA       | NA       | NA       | NA       | 0.10     | 0.37     | NA       | NA       | NA       | NA       |
| 2006        | 0.16     | 0.05     | 0.12     | 0.27     | NA       | NA       | 0.19     | 0.78     | 0.16     | 0.00     |
| 2007        | NA       | NA       | NA       | NA       | 0.52     | 0.65     | NA       | NA       | NA       | NA       |
| 2008        | 0.39     | 0.03     | 0.33     | 0.46     | NA       | NA       | 0.38     | 0.50     | 0.91     | 0.02     |
| 2009        | NA       | NA       | NA       | NA       | 0.36     | 0.59     | NA       | NA       | NA       | NA       |
| 2010        | 0.07     | 0.03     | 0.21     | 0.30     | NA       | NA       | 0.21     | 0.28     | 0.49     | 0.04     |
| 2011        | NA       | NA       | NA       | NA       | 0.01     | 0.31     | NA       | NA       | NA       | NA       |
| 2012        | 0.03     | 0.13     | 0.12     | 0.39     | NA       | NA       | 0.09     | 0.11     | 0.38     | 0.01     |
| 2013        | NA       | NA       | NA       | NA       | 0.02     | 0.04     | NA       | NA       | NA       | NA       |
| 2014        | 0.09     | 0.02     | 0.07     | 0.08     | NA       | NA       | 0.03     | NA       | 0.60     | 0.00     |
| 2015        | NA       | 1.11     | NA       | NA       |
| 2016        | 0.02     | 0.10     | 0.03     | 0.29     | 0.11     | 0.19     | 0.13     | NA       | 0.60     | NA       |

Density unit: ind. m<sup>-2</sup>

**Table S3.** Results of preliminary analysis (GLMMs) for selecting explanatory variables from the host fish density and the index of nutrient enrichment. We used the proportion of juvenile mussels as a response variable and stream ID as a random effect.

| Model | Log (host<br>fish<br>density) | Log (host<br>fish<br>density) <sup>2</sup> | Index of<br>nutrient<br>enrichment | (Index of<br>nutrient<br>enrichment) <sup>2</sup> | Intercept | AIC   |
|-------|-------------------------------|--------------------------------------------|------------------------------------|---------------------------------------------------|-----------|-------|
| 1     | -4.31                         | -4.20                                      | -                                  | -                                                 | -2.39     | 180.5 |
| 2     | -                             | -                                          | 0.54                               | -                                                 | -2.61     | 182.6 |
| 3     | -0.16                         | -                                          | -                                  | -                                                 | -2.58     | 183.6 |
| 4     | -                             | -                                          | 0.41                               | -0.17                                             | -2.60     | 184.6 |

**Table S4.** Results of the estimations of four nonlinear growth models in the three regions.

| <b>Northern Hokkaido</b> | <b>Bertalanffy</b> | <b>Gompertz*</b> | <b>Hyperbolic</b>  | <b>Logistic</b> |
|--------------------------|--------------------|------------------|--------------------|-----------------|
| $L_{\infty}$             | 96.95              | 87.58            | 136.12             | 85.06           |
| k                        | 0.01               | 0.19             | 0.07               | 0.29            |
| $t_0$                    | 1.87               | -                | 1.92               | -               |
| a                        | -                  | 3.78             | -                  | 8.98            |
| RSS                      | 7686               | 7219             | 7686               | 7228            |
| <b>Central Hokkaido</b>  | <b>Bertalanffy</b> | <b>Gompertz*</b> | <b>Hyperbolic</b>  | <b>Logistic</b> |
| $L_{\infty}$             | 136.20             | 112.19           | 205.00             | 104.73          |
| k                        | 0.04               | 0.09             | 0.03               | 0.14            |
| $t_0$                    | 2.72               | -                | 2.89               | -               |
| a                        | -                  | 3.27             | -                  | 17.27           |
| RSS                      | 1912               | 1747             | 1974               | 1809            |
| <b>Eastern Hokkaido</b>  | <b>Bertalanffy</b> | <b>Gompertz</b>  | <b>Hyperbolic*</b> | <b>Logistic</b> |
| $L_{\infty}$             | 127.43             | 109.94           | 178.02             | 103.33          |
| k                        | 0.02               | 0.05             | 0.02               | 0.08            |
| $t_0$                    | 3.67               | -                | 4.52               | -               |
| a                        | -                  | 2.84             | -                  | 27.52           |
| RSS                      | 4591               | 5426             | 4454               | 6626            |

\* The best fitting models.

**Table S5.** Results from the GLMs examining the abiotic factors affecting the host fish density in ascending order of AICc. The top two models with the lowest AICc are shown. Bold variables that were included in all  $\Delta\text{AICc} < 2$  models were considered influential variables.

| Model | Depth | Fine sediment | Maximum water temperature | Index of nutrient enrichment | Intercept | AICc | $\Delta\text{AICc}$ |
|-------|-------|---------------|---------------------------|------------------------------|-----------|------|---------------------|
| 1     | -     | -             | -                         | <b>-0.32</b>                 | -0.81     | 12.9 | 0.0                 |
| 2     | -     | 0.18          | -                         | -0.38                        | -0.81     | 15.1 | 2.2                 |
